# Supplementary material for: Molecular Diversity of Arbuscular Mycorrhizal Fungi (AMF) Associated with Carissa edulis, an Endangered Plant Species along Lake Victoria Basin of Kenya
Source: Hindawi journal article supplement (doi:10.1155/2021/7792282), 2021-08-26
Supplement: f1 [file 7792282.f1.docx]

**Supplementary figures**


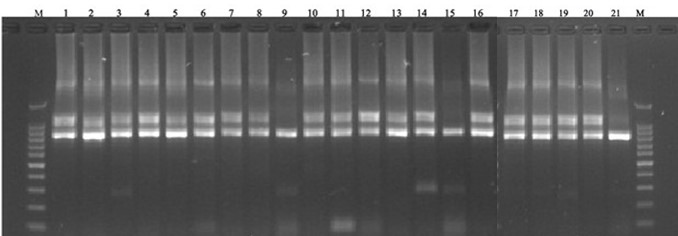


**Supplementary Figure 1:** Agarose gel showing PCR products from 1 to 21 while M in both ends represent 100bp marker


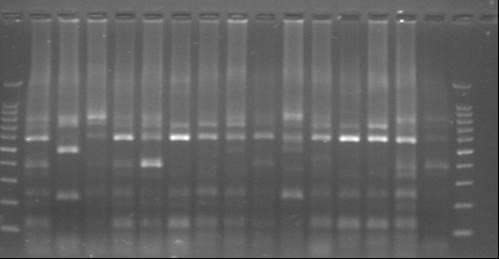


**Supplementary Figure 2:** Example a *Hae*III Restriction Fragment Length Polymorphism (RFLP) electrophoregram
